# Supplementary material for: Epigenetic control of the EWS-FLI1 promoter in Ewing's sarcoma
Source: PubMed Central journal article supplement — Oncol Rep. 2020 Feb 5;43(4):1199–207. doi: 10.3892/or.2020.7489 (PMC7057940; doi:10.3892/or.2020.7489), 2020-02-05
Supplement: Supplementary_Data.pdf [file Supplementary_Data.pdf]

Table SI. Primary and secondary antibodies used in immunohistochemistry assays.

| Protein       | Clone         | Code no. | Manufacturer | Dilution   | Localization                 | Species           |
|---------------|---------------|----------|--------------|------------|------------------------------|-------------------|
| CD99          | 12E7          | IR057    | Dako         | Prediluted | Membrane                     | Mouse anti-human  |
| FLI1          | 28-8          | ab205921 | Abcam        | 1:200      | Nuclear                      | Mouse anti-human  |
| HNK-1 (CD57)  | TB01          | IR647    | Dako         | Prediluted | Membrane                     | Mouse anti-human  |
| Vimentin      | V9            | IR630    | Dako         | Prediluted | Cytoplasm                    | Mouse anti-human  |
| Enolase       | BBS/NC/VI-H14 | IR612    | Dako         | Prediluted | Cytoplasm                    | Mouse anti-human  |
| Chromogranin  | DAK-A3        | M0869    | Dako         | 1:200      | Cytoplasm                    | Mouse anti-human  |
| Synaptophysin | DAK-SYNAP     | IR660    | Dako         | Prediluted | Cytoplasm                    | Mouse anti-human  |
| S-100         | Polyclonal    | IR504    | Dako         | Prediluted | Cytoplasm and<br>nuclear     | Mouse anti-human  |
| CD45          | 2B11 + PD7/26 | IR751    | Dako         | Prediluted | Membrane                     | Mouse anti-human  |
| CD117         | Polyclonal    | A4502    | Dako         | 1:200      | Membrane                     | Rabbit anti-human |
| TdT           | EP266         | IR093    | Dako         | Prediluted | Nuclear                      | Rabbit anti-human |
| Desmine       | D33           | IR606    | Dako         | Prediluted | Cytoplasm                    | Mouse anti-human  |
| Myogenin      | F5D           | IR067    | Dako         | Prediluted | Cytoplasm                    | Mouse anti-human  |
| CK AE1/3      | AE1/AE3       | IR053    | Dako         | Prediluted | Membrane and/or<br>cytoplasm | Mouse anti-human  |
